# Supplementary material
Source: PubMed Central journal article supplement (PMC4987286)
Supplement: NIHMS807289-supplement-Supplemental_Data.pdf [file NIHMS807289-supplement-Supplemental_Data.pdf]

Supplemental Appendix A. Distributional summaries of PET textural features, along with MTV and SUV<sub>max</sub>.

| Variable  | Label                    | N   | Min.   | 1 <sup>st</sup> Qu. | Median | Mean   | 3 <sup>rd</sup> Qu. | Max.  | Std Deviation | Skewness <sup>1</sup> |
|-----------|--------------------------|-----|--------|---------------------|--------|--------|---------------------|-------|---------------|-----------------------|
| Feature1  | Tumor MTV                | 201 | 1.208  | 9.925               | 26.78  | 67.35  | 79.35               | 636.2 | 103.802       | 2.97                  |
| Feature2  | Tumor SUV <sub>max</sub> | 201 | 3.523  | 9.459               | 13.15  | 14.7   | 18.36               | 53.22 | 7.716         | 1.368                 |
| Feature3  | Variance                 | 201 | 16.42  | 40.56               | 48.03  | 49.06  | 58.46               | 91.23 | 12.99         | 0.183                 |
| Feature4  | Skewness                 | 201 | -1.909 | -0.499              | -0.239 | -0.22  | 0.095               | 0.826 | 0.454         | -0.311                |
| Feature5  | Kurtosis                 | 201 | -1.266 | -0.866              | -0.649 | -0.531 | -0.361              | 3.339 | 0.568         | 2.899                 |
| Feature6  | Energy                   | 201 | 0.002  | 0.003               | 0.004  | 0.01   | 0.006               | 0.315 | 0.032         | 7.11                  |
| Feature7  | Contrast                 | 201 | 3.798  | 19.6                | 33.26  | 36.54  | 48.44               | 147.3 | 22.156        | 1.46                  |
| Feature8  | Entropy                  | 201 | 3.247  | 5.632               | 5.937  | 5.805  | 6.106               | 6.48  | 0.477         | -2.435                |
| Feature9  | Homogeneity              | 201 | 0.185  | 0.267               | 0.326  | 0.336  | 0.384               | 0.655 | 0.088         | 0.776                 |
| Feature10 | IDM                      | 201 | 0.103  | 0.176               | 0.24   | 0.253  | 0.304               | 0.613 | 0.097         | 0.92                  |
| Feature11 | Correlation              | 201 | -0.022 | 0.529               | 0.621  | 0.61   | 0.716               | 0.883 | 0.15          | -0.779                |
| Feature12 | SumMean                  | 201 | 0.011  | 0.016               | 0.018  | 0.018  | 0.02                | 0.027 | 0.003         | -0.174                |
| Feature13 | Variance2                | 201 | 0.014  | 0.034               | 0.041  | 0.043  | 0.052               | 0.078 | 0.013         | 0.334                 |
| Feature14 | Dissimilarity            | 201 | 1.442  | 3.171               | 4.157  | 4.393  | 5.375               | 9.948 | 1.54          | 0.64                  |
| Feature15 | SRE                      | 201 | 0.466  | 0.552               | 0.569  | 0.565  | 0.584               | 0.603 | 0.024         | -1.065                |
| Feature16 | LRE                      | 201 | 2.058  | 2.28                | 2.523  | 2.857  | 2.845               | 16.84 | 1.548         | 6.671                 |
| Feature17 | GLN                      | 201 | 6.821  | 45.69               | 146.4  | 355.3  | 412.5               | 5560  | 585.449       | 4.415                 |
| Feature18 | RLN                      | 201 | 90.96  | 963                 | 2862   | 5545   | 6942                | 59760 | 7623.364      | 2.978                 |
| Feature19 | RP                       | 201 | 0.368  | 0.664               | 0.692  | 0.681  | 0.72                | 0.75  | 0.055         | -2.328                |
| Feature20 | LGRE                     | 201 | 0.003  | 0.008               | 0.012  | 0.016  | 0.022               | 0.091 | 0.012         | 2.397                 |
| Feature21 | HGRE                     | 201 | 167.1  | 295.5               | 349.6  | 351    | 407.9               | 601.7 | 83.149        | 0.08                  |
| Feature22 | SRLGE                    | 201 | 0.002  | 0.005               | 0.007  | 0.01   | 0.013               | 0.055 | 0.008         | 2.399                 |
| Feature23 | SRHGE                    | 201 | 94.58  | 167.3               | 196.1  | 193.8  | 222.3               | 284.4 | 40.779        | -0.308                |
| Feature24 | LRLGE                    | 201 | 0.009  | 0.021               | 0.029  | 0.039  | 0.044               | 0.242 | 0.031         | 2.99                  |
| Feature25 | LRHGE                    | 201 | 349.9  | 699.3               | 912.8  | 1168   | 1209                | 16320 | 1455.334      | 7.684                 |
| Feature26 | GLV                      | 201 | 0.015  | 0.057               | 0.082  | 0.089  | 0.104               | 0.365 | 0.053         | 2.307                 |
| Feature27 | RLV                      | 201 | 0.001  | 0.008               | 0.016  | 0.023  | 0.031               | 0.138 | 0.023         | 2.606                 |
| Feature28 | SZE                      | 201 | 0.457  | 0.592               | 0.636  | 0.641  | 0.681               | 0.855 | 0.073         | 0.52                  |
| Feature29 | LZE                      | 201 | 1.848  | 6.838               | 34.2   | 506.8  | 179.2               | 27580 | 2198.135      | 9.912                 |
| Feature30 | GLN2                     | 201 | 1      | 5.298               | 12.78  | 17.46  | 23.33               | 102.5 | 17.383        | 2.061                 |
| Feature31 | ZSN                      | 201 | 7.5    | 51.93               | 106    | 136.6  | 175.3               | 705.1 | 119.503       | 1.767                 |
| Feature32 | ZP                       | 201 | 0.051  | 0.238               | 0.352  | 0.38   | 0.519               | 0.805 | 0.179         | 0.383                 |
| Feature33 | LGZE                     | 201 | 0.006  | 0.014               | 0.019  | 0.023  | 0.027               | 0.093 | 0.013         | 2.333                 |
| Feature34 | HGZE                     | 201 | 168.7  | 252.7               | 277.6  | 283.8  | 314                 | 466.1 | 46.18         | 0.304                 |
| Feature35 | SZLGE                    | 201 | 0.004  | 0.009               | 0.013  | 0.017  | 0.02                | 0.086 | 0.012         | 2.513                 |
| Feature36 | SZHGE                    | 201 | 92.11  | 139.8               | 163.1  | 170.3  | 189.9               | 367.2 | 43.085        | 1.06                  |

| Variable  | Label      | N   | Min.  | 1 <sup>st</sup> Qu. | Median | Mean   | 3 <sup>rd</sup> Qu. | Max.     | Std Deviation | Skewness <sup>1</sup> |
|-----------|------------|-----|-------|---------------------|--------|--------|---------------------|----------|---------------|-----------------------|
| Feature37 | LZLGE      | 201 | 0.023 | 0.091               | 0.17   | 2.556  | 0.738               | 96.62    | 10.008        | 6.605                 |
| Feature38 | LZHGE      | 201 | 382.2 | 2322                | 13330  | 244600 | 64560               | 11740000 | 1044198.852   | 8.18                  |
| Feature39 | GLV2       | 201 | 0     | 0.001               | 0.003  | 0.015  | 0.013               | 0.265    | 0.035         | 4.488                 |
| Feature40 | ZSV        | 201 | 0     | 0                   | 0      | 0      | 0                   | 0.002    | 0             | 3.836                 |
| Feature41 | Coarseness | 201 | 0.001 | 0.005               | 0.012  | 0.024  | 0.03                | 0.165    | 0.029         | 2.175                 |
| Feature42 | Contrast2  | 201 | 0.021 | 0.158               | 0.252  | 0.372  | 0.414               | 4.657    | 0.522         | 5.927                 |
| Feature43 | Busyness   | 201 | 0.016 | 0.08                | 0.156  | 0.285  | 0.334               | 3.253    | 0.387         | 3.787                 |
| Feature44 | Complexity | 201 | 297.1 | 680.9               | 909.7  | 939.4  | 1134                | 2147     | 329.896       | 0.629                 |
| Feature45 | Strength   | 201 | 0.334 | 1.952               | 4.244  | 8.657  | 9.736               | 53.11    | 10.757        | 2.094                 |

<sup>1</sup> This corresponds to the statistic  $(\frac{n-1}{n})^{3/2} m_3 / m_2^{3/2}$ . A negative value indicates a left-skewed distribution. A positive value indicates a right-skewed distribution, with larger values indicating a greater degree of skewness<sup>19</sup>.

Supplemental Appendix B. Bootstrap internal validation of model performance (1000 iterations).

|                                     | Original<br>(i.e. sample)<br>C-statistic | Optimism | Final<br>C-statistic | 95% bootstrap<br>confidence interval<br>of final C-statistic |
|-------------------------------------|------------------------------------------|----------|----------------------|--------------------------------------------------------------|
| Clinical factors only*              | 0.62                                     | 0.02     | 0.60                 | (0.56, 0.64)                                                 |
| Clinical factors + MTV**            | 0.63                                     | 0.02     | 0.61                 | (0.57, 0.65)                                                 |
| Clinical factors + MTV + SumMean*** | 0.65                                     | 0.02     | 0.63                 | (0.59, 0.67)                                                 |

\*: Age, gender, performance status, performance status x time, clinical stage

\*\* : Age, gender, performance status, performance status x time, clinical stage, log(MTV)

\*\*\*: Age, gender, performance status, performance status x time, clinical stage, log(MTV), 100xSumMean, log(MTV) x 100xSumMean. This last model is equivalent to that shown in Table 2.

Supplemental Appendix C. Nomogram of the multivariate Cox model presented in Table 2.

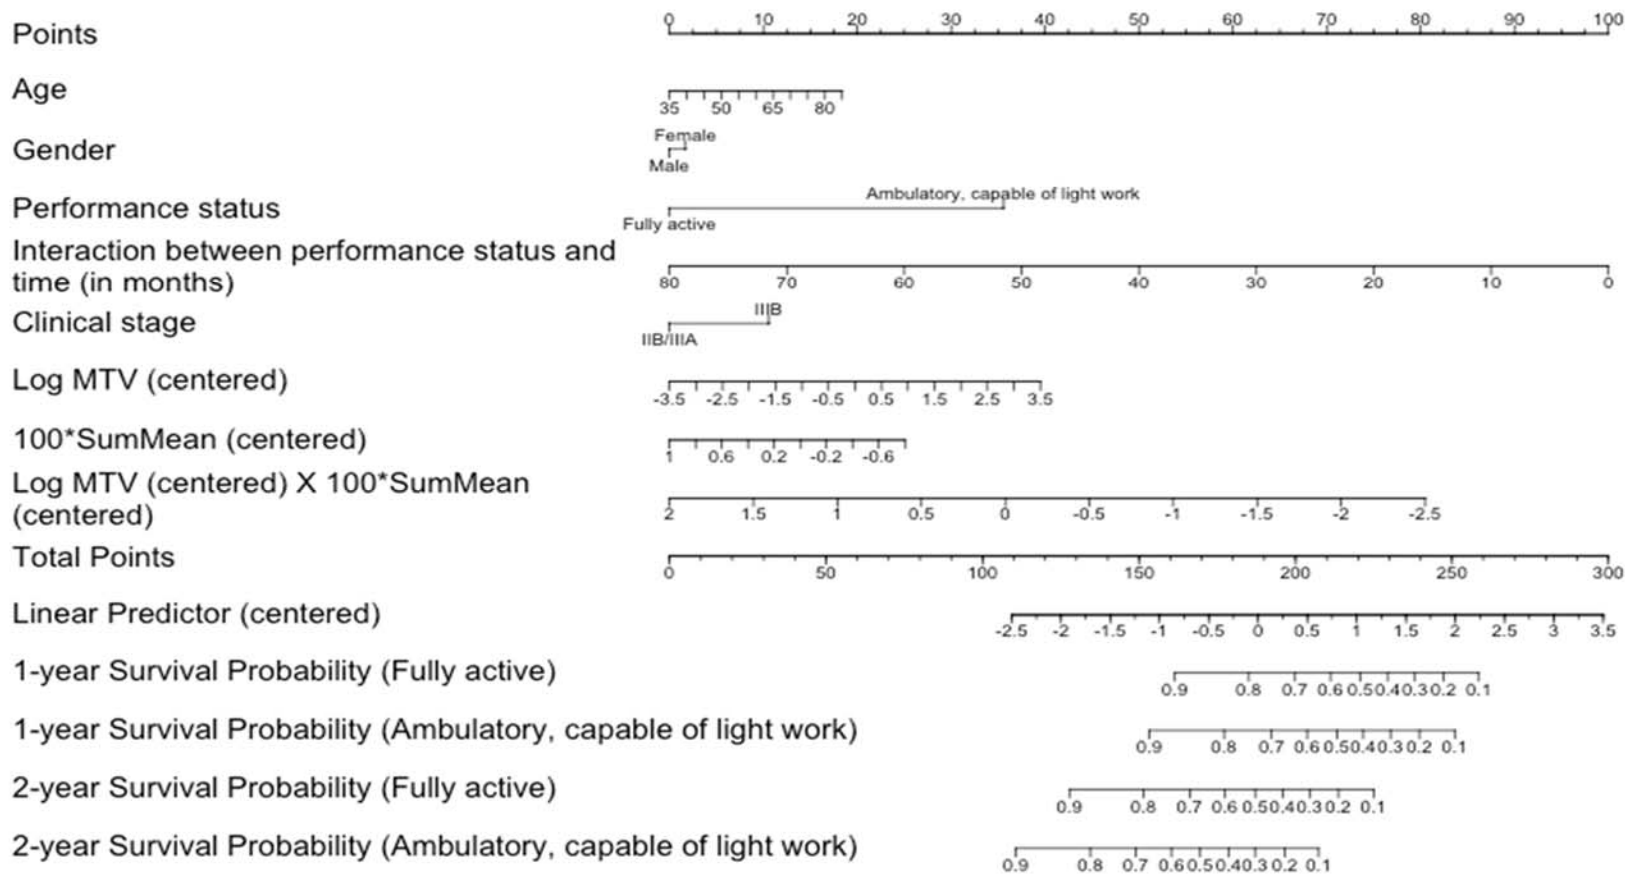

The linear predictor (centered) is the linear predictor of the Cox model in Table 2 minus the overall mean of linear predictors (0.9455).

Use: In order to use the above nomogram to estimate the predicted X-year survival probability for a patient, first for each predictor determine the number of points via a straight line to the “Points” line (top row). Next, sum the points over all predictors to arrive at the Total Points. Finally, according to the performance status of the patient, draw a straight line from the “Total Points” line to either the “X-year Survival Probability (Fully active)” line or the “X-year Survival Probability (Ambulatory, capable of light work)” line to determine the predicted probability.

Examples:

- A. For a male patient, age 60, with stage IIIB and performance status of 1 (Ambulatory, capable of light work), suppose that the MTV was  $100 \text{ cm}^3$  and the SumMean was 0.02. Then  $\log \text{MTV}$  (centered) corresponds to  $\log(100) - 3.293 = 1.312$  (where the natural logarithm is used), and  $100 * \text{SumMean}$  (centered) corresponds to  $100 * 0.02 - 1.809 = 0.191$ . Then approximating the number of points for each predictor we have:

Age = 9 pts

Gender = 0 pts

Performance status = 35 pts

Interaction between performance status (Ambulatory, capable of light work) and time (@1 year) = 85 pts

Interaction between performance status (Ambulatory, capable of light work) and time (@2 years) = 70 pts

Clinical stage = 11 pts

Log MTV (centered) = 27 pts

$100 * \text{SumMean}$  (centered) = 12 pts

Log MTV (centered) X  $100 * \text{SumMean}$  (centered) = 31 pts

Total points (@1 year) = 210

Total points (@2 years) = 195

1-year Survival Probability (Ambulatory, capable of light work) = 0.54

2-year Survival Probability (Ambulatory, capable of light work) = 0.23

B. For a patient with identical characteristics to that of example A, but with a performance status of 0 (Fully active).  
Again, approximating the number of points for each predictor we have:

Age = 9 pts

Gender = 0 pts

Performance status = 0 pts

Interaction between performance status (Fully active) and time (@1 year) = 100 pts

Interaction between performance status (Fully active) and time (@2 years) = 100 pts

Clinical stage = 11 pts

Log MTV (centered) = 27 pts

100\*SumMean (centered) = 12 pts

Log MTV (centered) X 100\*SumMean (centered) = 31 pts

Total points (@1 year) = 190

Total points (@2 years) = 190

1-year Survival Probability (Fully active) = 0.77

2-year Survival Probability (Fully active) = 0.47
